# Supplementary material for: Resistance switching mode transformation in SrRuO3/Cr-doped SrZrO3/Pt frameworks via a thermally activated Ti out-diffusion process
Source: PubMed Central journal article supplement — Sci Rep. 2014 Dec 8;4:7354. doi: 10.1038/srep07354 (PMC4258682; doi:10.1038/srep07354), 2014-12-08
Supplement: srep07354-s1.pdf [file srep07354-s1.pdf]

## Resistance switching mode transformation in SrRuO<sub>3</sub>/Cr-doped SrZrO<sub>3</sub>/Pt frameworks via a thermally activated Ti out-diffusion process

Yongcheol Jo<sup>1</sup>, Kyooho Jung<sup>1,2</sup>, Jongmin Kim<sup>1</sup>, Hyeonseok Woo<sup>1</sup>, Jaeseok Han<sup>1</sup>, Hyungsang Kim<sup>1</sup>, JinPyo Hong<sup>3</sup>, Jeon-Kook Lee<sup>4</sup>, Hyunsik Im<sup>1</sup>

<sup>1</sup>Division of Physics and Semiconductor Science, Dongguk University, Seoul 100-715, Korea, <sup>2</sup>R&D Division, Flash Integration Technology Team, SK-Hynix, 2091 Gyeongchung daero Bubal-eub, Icheon-si Gyeonggi-do, Korea, <sup>3</sup>Department of Physics, Hanyang University, Seoul, Korea, <sup>4</sup>Future Convergence Research Division, Interface Control Research Center, Korea Institute Science & Technology (KIST), Seoul 136-791, Republic of Korea.

Energy dispersive X-ray spectrometry (EDX) measurements were performed to identify the dark spots in the Pt bottom electrode (see Fig. 4 (a) and Fig. 6 (a)). Figure S1 shows the focused ion beam (FIB) SEM image of the Pt layer for the M sample and EDX spectrum around the red line marked in the SEM image. Ti and O peaks are detected, supporting that the dark regions in the SEM image are Ti-O compounds, TiO<sub>x</sub>.

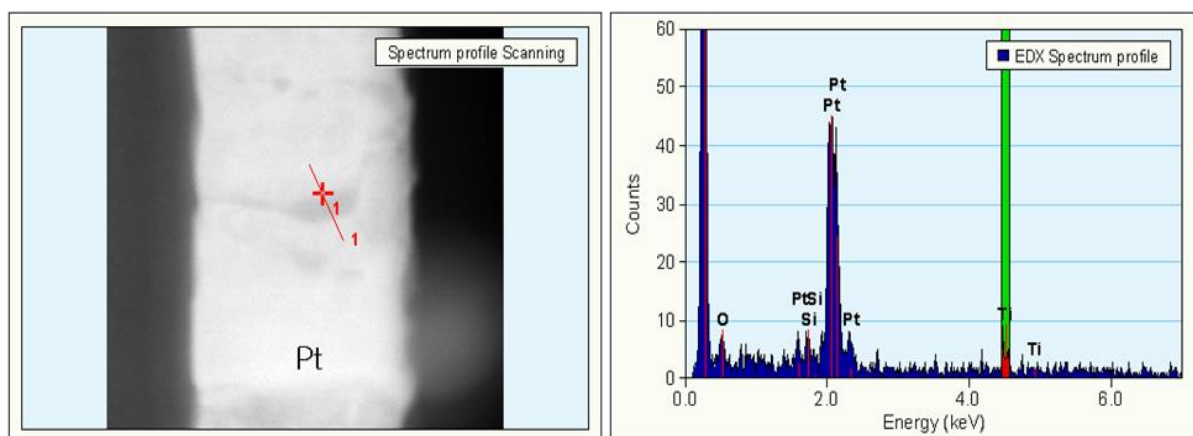

Figure S1. Focused ion beam SEM image of the Pt layer for the M sample (left) and EDX spectrum profile (right) taken around the red line in the SEM image.

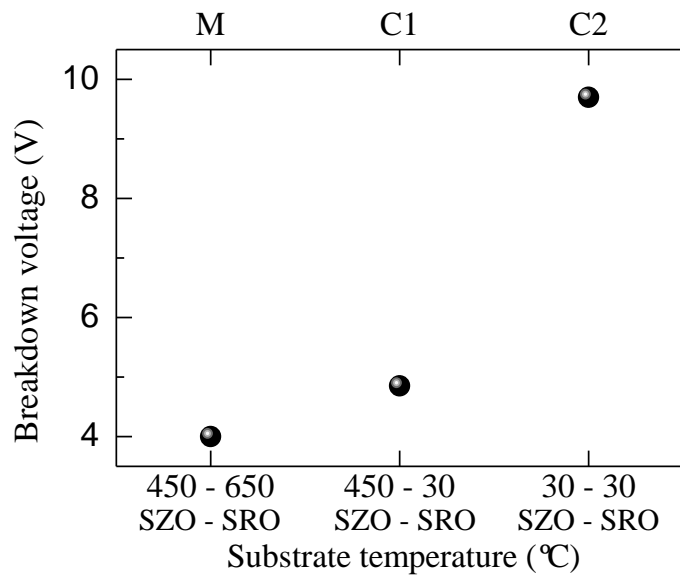

Figure S2. Breakdown voltage for the M, C1 and C2 samples.

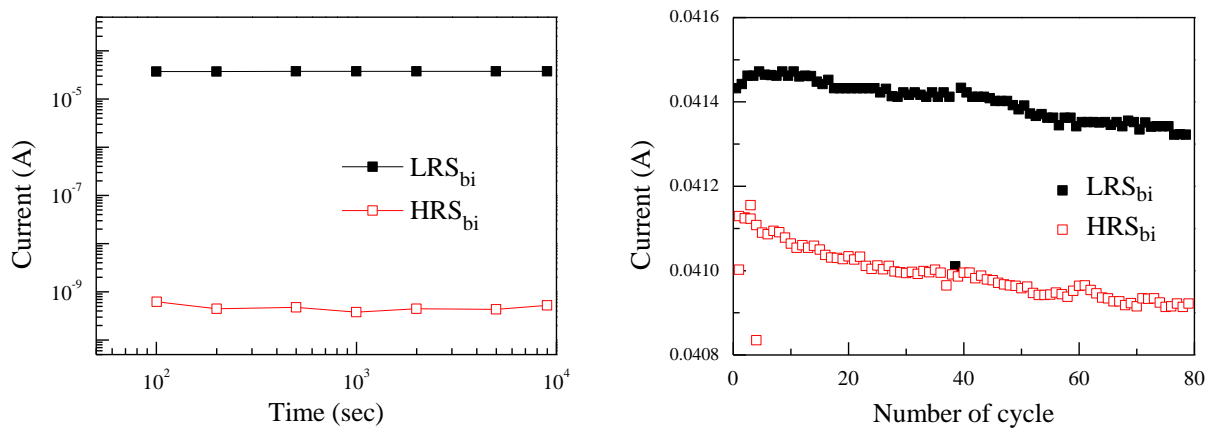

Figure S3. Retention (left) and endurance properties (right) in the bipolar RS mode. 100 Hz pulsed voltage bias (read – reset – read – set) is applied for the switching measurement.
